# Supplementary material for: DL-Methionyl–DL-Methionine/DL-Methionine Supplementation Alleviated the Adverse Effects of Dietary Low Fishmeal Levels on Growth and Intestinal Health of Micropterus salmoides
Source: MDPI journal article supplement (doi:10.3390/antiox13030359), 2024-03-18
Supplement: s1 [file s1]

Supplementary material

**Table S1.** The main ingredients' chemical content and amino acid content.

| Nutrient content<br>of wet matter (%) | Ingredients |                 |                 |                     |                            |
|---------------------------------------|-------------|-----------------|-----------------|---------------------|----------------------------|
|                                       | Fish meal   | Poultry<br>meal | Soybean<br>meal | Corn gluten<br>meal | Soy protein<br>concentrate |
| Essential amino acid                  |             |                 |                 |                     |                            |
| Arg                                   | 3.49        | 4.20            | 3.51            | 1.80                | 4.65                       |
| His                                   | 1.95        | 1.29            | 1.25            | 1.27                | 1.71                       |
| ILe                                   | 2.60        | 2.62            | 2.19            | 2.30                | 2.96                       |
| Leu                                   | 4.59        | 4.72            | 3.71            | 9.62                | 5.00                       |
| Lys                                   | 4.93        | 3.88            | 3.01            | 0.94                | 4.10                       |
| Met                                   | 1.79        | 1.33            | 0.68            | 1.36                | 0.90                       |
| Phe                                   | 2.77        | 2.78            | 2.58            | 3.67                | 3.40                       |
| Thr                                   | 2.66        | 2.61            | 1.92            | 1.92                | 2.57                       |
| Val                                   | 3.06        | 3.21            | 2.30            | 2.66                | 3.08                       |
| Nonessential amino acid               |             |                 |                 |                     |                            |
| Cys                                   | 0.64        | 1.00            | 0.70            | 1.09                | 0.90                       |
| Met+ Cys                              | 2.43        | 2.33            | 1.38            | 2.45                | 1.80                       |
| Gly                                   | 3.94        | 5.28            | 2.05            | 1.59                | 2.71                       |
| Ser                                   | 2.38        | 3.28            | 2.41            | 2.99                | 3.25                       |
| Pro                                   | 2.76        | 4.08            | 2.61            | 5.80                | 3.54                       |
| Ala                                   | 3.99        | 3.78            | 2.10            | 5.05                | 2.77                       |
| Asp                                   | 5.83        | 5.32            | 5.59            | 3.48                | 7.45                       |
| Glu                                   | 8.18        | 8.41            | 8.77            | 12.73               | 11.64                      |
| Main chemical content                 |             |                 |                 |                     |                            |
| Dry matter                            | 93.23       | 91.81           | 89.58           | 92.80               | 90.63                      |
| Crude protein                         | 66.44       | 66.89           | 49.92           | 60.91               | 66.08                      |
| Crude fat                             | 6.30        | 7.25            | 3.25            | -                   | -                          |
| Gross energy<br>(KJ/g)                | 23.70       | 27.90           | 24.20           | 28.30               | 24.80                      |
